# Supplementary material for: RHOA signaling defects result in impaired axon guidance in iPSC-derived neurons from patients with tuberous sclerosis complex
Source: PubMed Central journal article supplement (PMC8110792; doi:10.1038/s41467-021-22770-4), 2021-05-10
Supplement: 41467_2021_22770_MOESM1_ESM.pdf [file 41467_2021_22770_MOESM1_ESM.pdf]

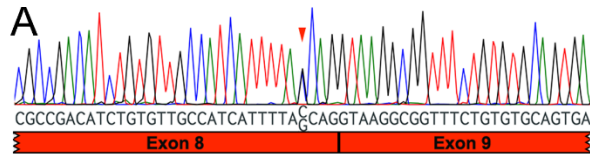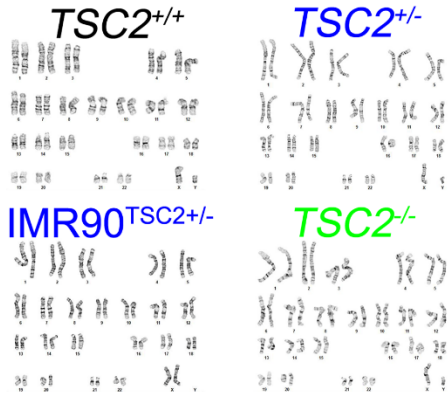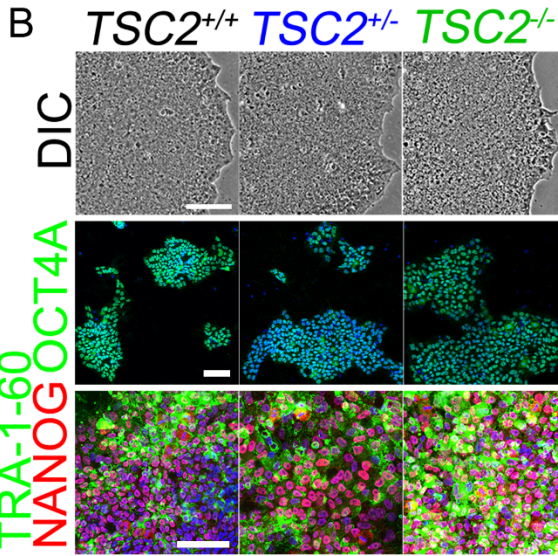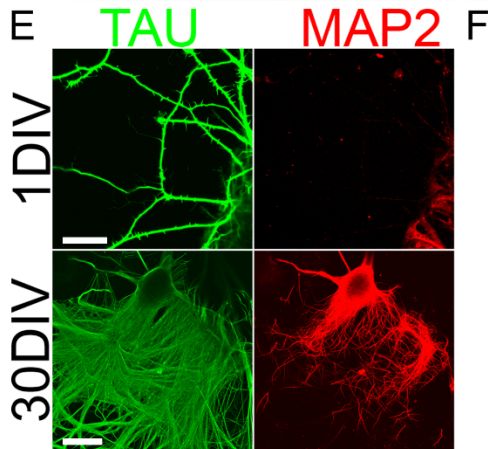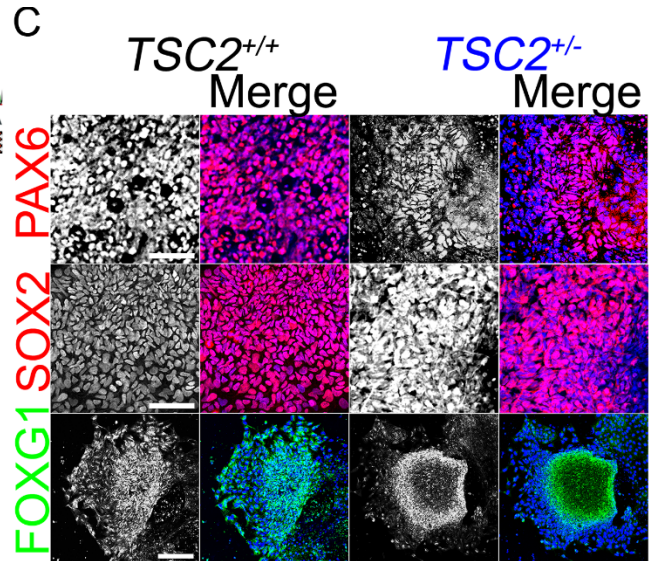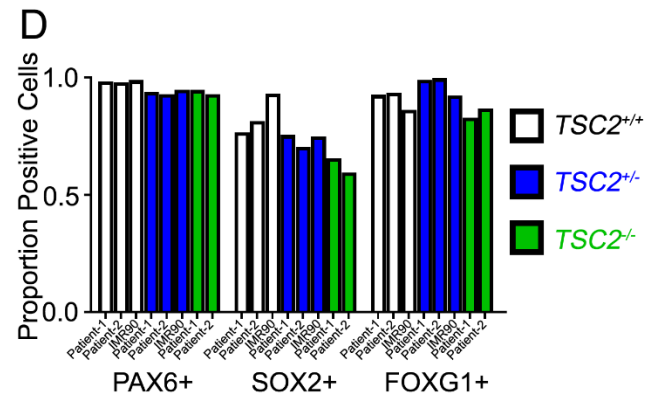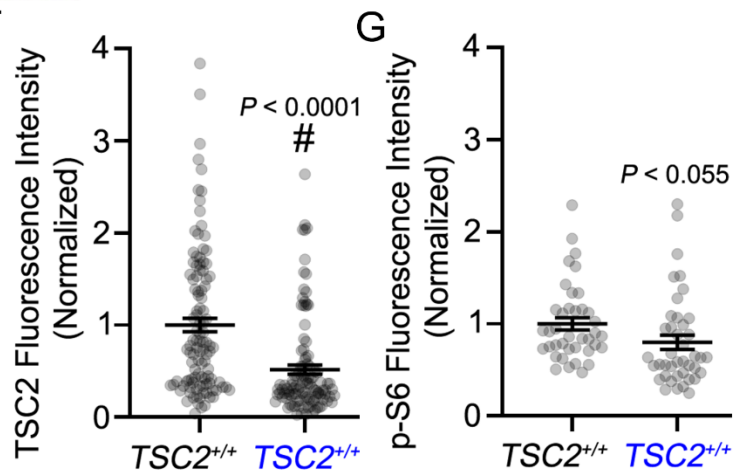

**Supplemental Figure 1: *TSC2* mutant iPSCs and neurons express normal cell fate markers.** **A.** Sanger sequencing of *TSC2*<sup>+/-</sup> iPSCs showed a nonsense mutation at bp 972 near the boundary between exon 8 and exon 9. Representative karyotypes shown from a clone of *TSC2*<sup>+/+</sup>, patient-derived and IMR90 *TSC2*<sup>+/-</sup>, and *TSC2*<sup>-/-</sup> genotypes, respectively. **B.** Reprogrammed iPSCs from patient lines as well as CRISPR-Cas9 corrected *TSC2*<sup>+/+</sup> and *TSC2*<sup>-/-</sup> cells were positive for pluripotency markers NANOG, OCT4, and TRA-1-60, and showed normal morphology and similar growth rates. **C-D.** Immunofluorescence for early neural (Sox2), progenitor (PAX6), and dorsal forebrain (FOXP1) fates showed appropriate neural differentiation in all cell lines. **E.** Co-staining for axonal marker TAU and dendritic marker MAP2 showed axonal specification at 1DIV in neurosphere preparations, and short dendritic processes in neurons migrating away from the neurosphere at 30DIV. **F-G.** Similar to patient-derived cells (Figure 1) in comparison to their isogenic controls, CRISPR-Cas9 generated IMR90<sup>*TSC2*<sup>+/-</sup></sup> growth cones showed reduced *TSC2* expression ( $P < 0.0001$ ), as well as no significant difference in S6 activity relative to IMR90 controls ( $P < 0.055$ ). #  $P < 0.0001$ . Two-tailed Student's t-test (F and G), represented as mean +/- s.e.m. Scale, 100  $\mu$ m (B, C), 40 and 100  $\mu$ m (E). Source data are provided as a Source Data file.

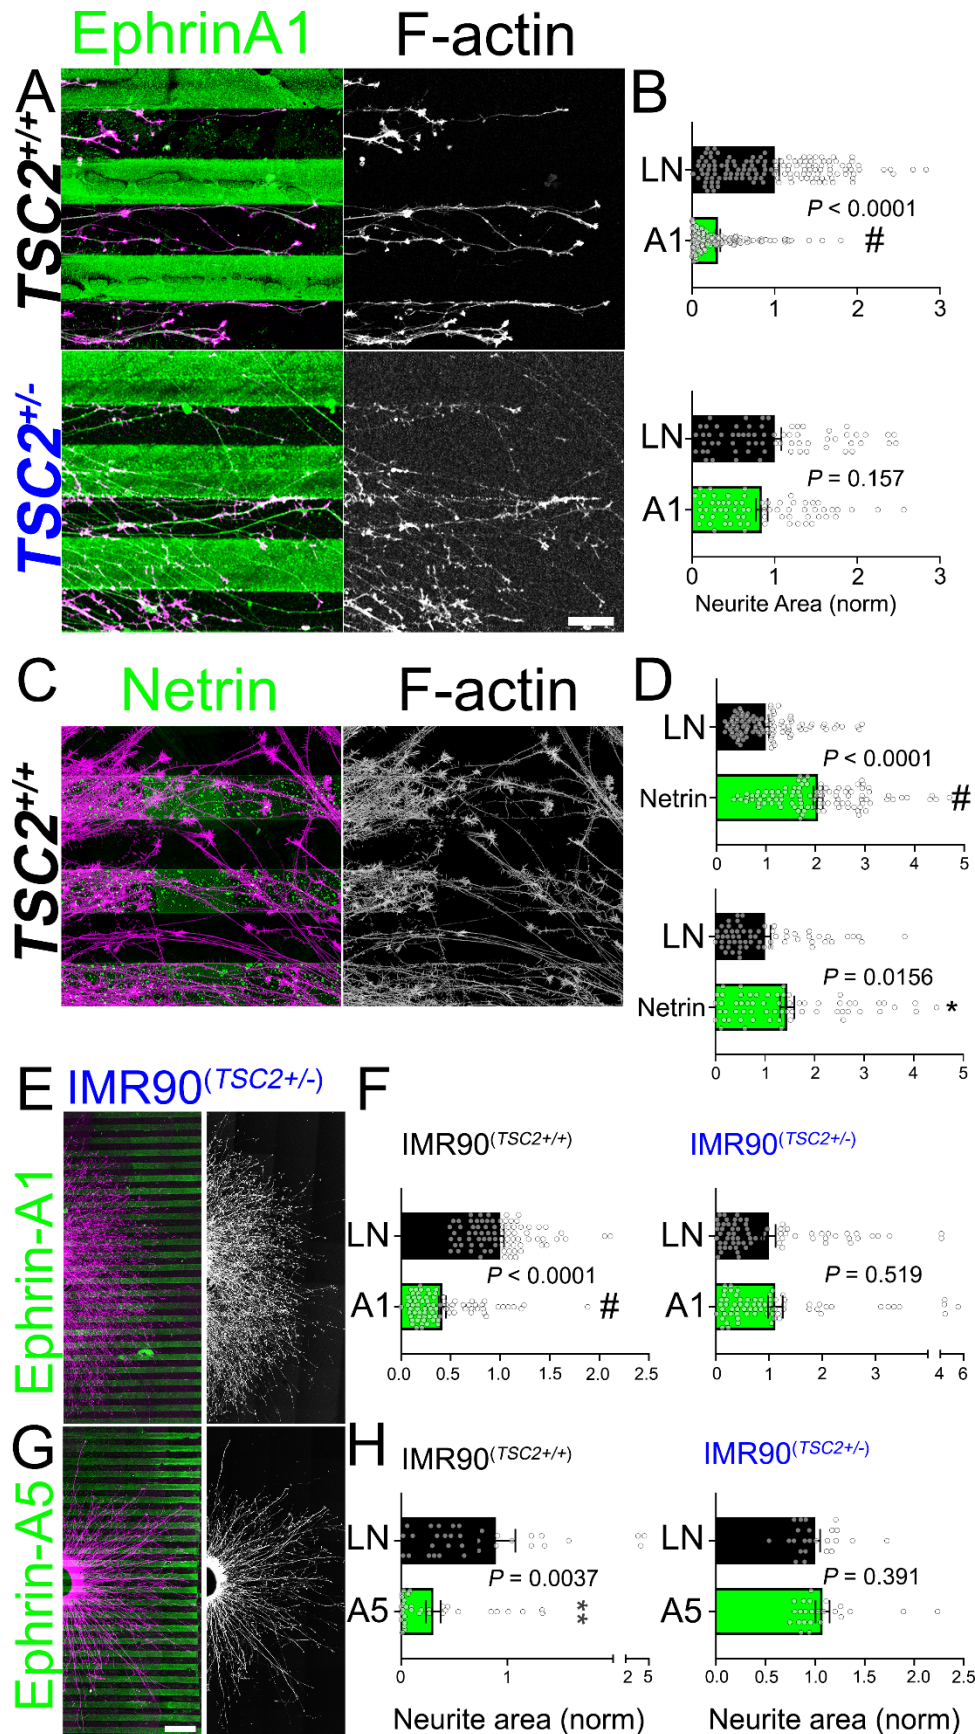

## Supplemental Figure 2: Pathfinding by control hFB neurons along ephrin-A1

**repulsive stripes is lost in  $TSC2^{+/-}$  hFB neurons. A, B.** High magnification images of LN/ephrin-A1 patterns (A) and analysis (B) of thresholded area occupied by neurites (F-actin channel) on each substratum normalized to the area of neurites growing on laminin only (see Methods). Note that  $TSC2^{+/+}$  neurites robustly avoided Ephrin-A1 stripes ( $P < 0.0001$ ), while  $TSC2^{+/-}$  neurites failed to guide ( $P = 0.157$ ). **C,D.**  $TSC2^{+/+}$  ( $P < 0.0001$ ) and  $TSC2^{+/-}$  hFB neurites show a preference for Netrin-1 stripes ( $P = 0.0156$ ). **E-H.** IMR90 $TSC2^{+/-}$  neurites also cannot be guided by patterned ephrin-A1 ( $P = 0.519$ ) (**E-F**) or ephrin-A5 ( $P = 0.391$ ) (**G-H**) in comparison to IMR90 control neurospheres (ephrin-A1:  $P < 0.0001$ ; ephrin-A5:  $P = 0.0037$ ). \*  $P < 0.05$ , \*\*  $P < 0.01$ , #  $P < 0.0001$ , Two-tailed Student's t-test, represented as mean +/- s.e.m. Scale, 100  $\mu$ m. Source data are provided as a Source Data file.

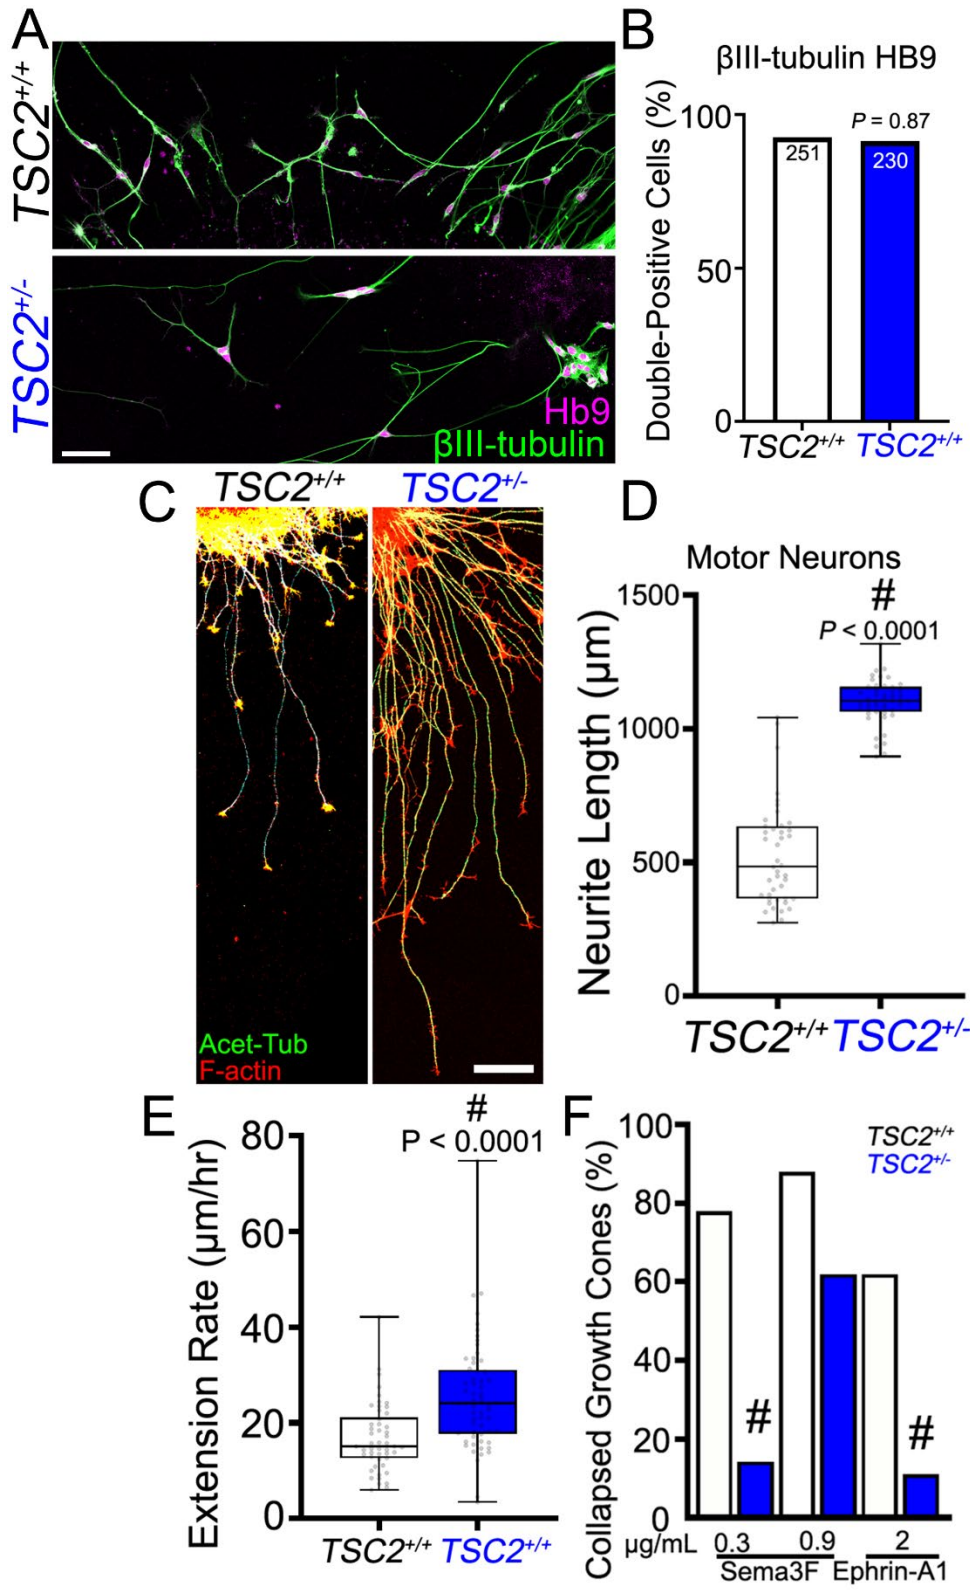

**Supplemental Figure 3: *TSC2*<sup>+/-</sup> human motor neurons exhibit enhanced neurite extension compared to isogenic control neurons. A, B.** Images and quantification of neurons co-labeled with neuron-specific  $\beta$ III-tubulin and MN-specific HB9 antibodies. Quantification reflects % of  $\beta$ III-tubulin-positive neurons co-labeled with HB9 ( $P = 0.87$ ). **C.** hMN neurospheres of indicated genotype after one day *in vitro* were immunolabeled for acetylated-tubulin (green) and counter-stained for F-actin (red). Note longer axons extend from *TSC2*<sup>+/-</sup> neurospheres compared to isogenic control neurons. **D.** Average neurite lengths of 9 longest axons per neurosphere of each genotype ( $P < 0.0001$ ). **E.** Average axon extension rates show that *TSC2*<sup>+/-</sup> hMN neurites grew markedly faster compared to isogenic control neurons ( $P < 0.0001$ ). **F.** Analysis of percent growth cone collapse by *TSC2*<sup>+/+</sup> and *TSC2*<sup>+/-</sup> hMNs in response to Sema-3F (*TSC2*<sup>+/+</sup> vs. *TSC2*<sup>+/-</sup>: high,  $P = 0.0024$ ; low,  $P < 0.0001$ ) and ephrin-A1 (*TSC2*<sup>+/+</sup> vs. *TSC2*<sup>+/-</sup>,  $P < 0.0001$ ). For MN experiments, ephrin-A1 was pre-clustered prior to application. Two-tailed Student's T-test, data represented as min, max, median, and IQR (D-E). Two-tailed Fisher's Exact Test (B,F). \*\*  $P < 0.05$ , #  $P < 0.0001$ . Scale, 100  $\mu$ m. Source data are provided as a Source Data file.

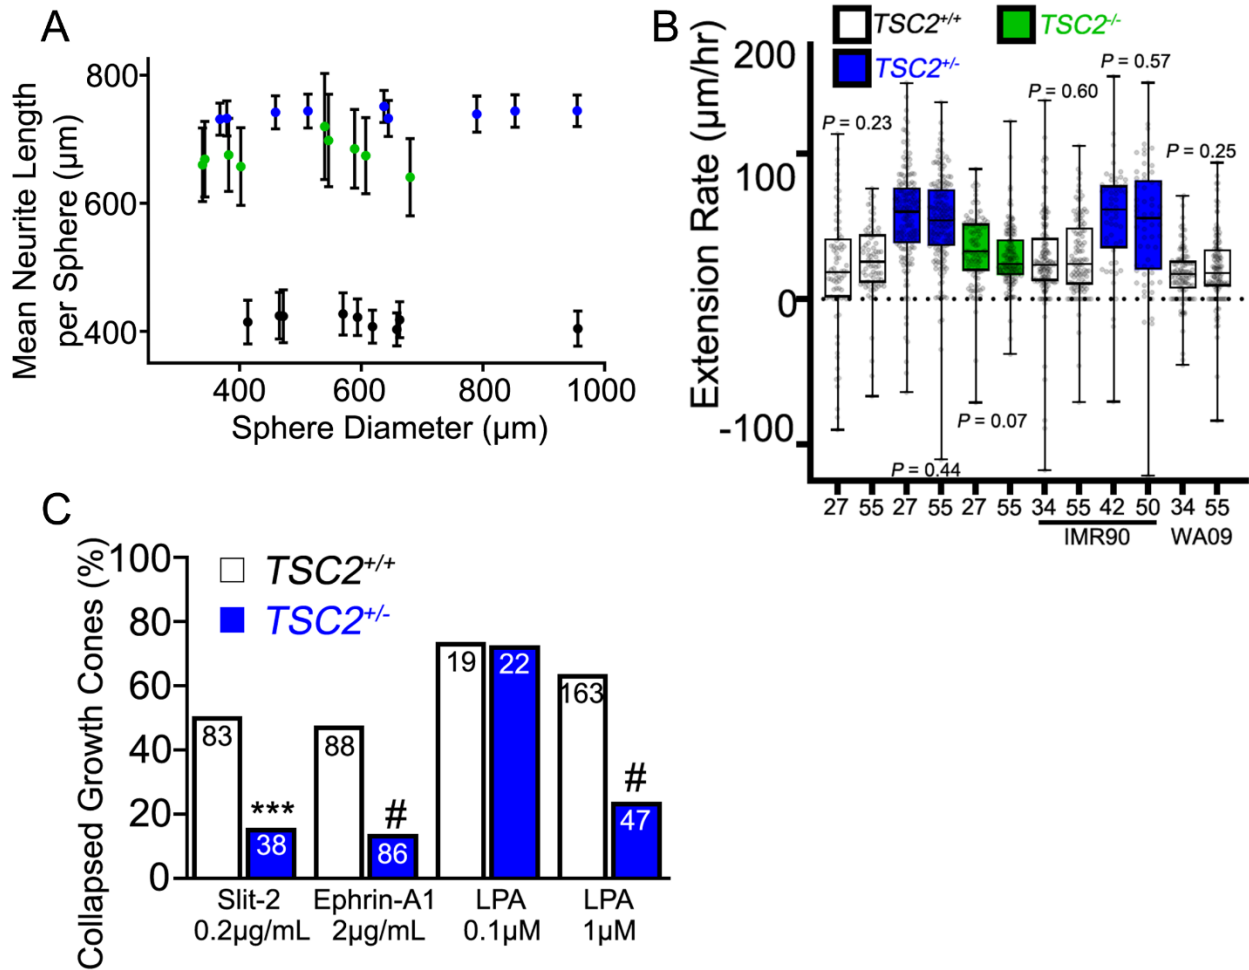

**Supplemental Figure 4: Control cortical neurons differentiated from iPSC (IMR90) and ESC (WA09) lines are sensitive to inhibitory guidance cues. A.** Mean neurite lengths from different sized neurospheres of each genotype were compared and no significant differences in outgrowth of spheres within each genotype were found between 200-1000 microns in diameter. **B.** Outgrowth rates of neurites of several cell lines were compared at early and late passage, and intra-line rates persist beyond passages utilized for experiments ( $TSC2^{+/+}$ ,  $P = 0.23$ ;  $TSC2^{+/-}$ ,  $P = 0.44$ ;  $TSC2^{-/-}$ ,  $P = 0.07$ ; IMR90,  $P = 0.60$ ; IMR90 $TSC2^{+/-}$ ,  $P = 0.57$ ; WA09,  $P = 0.25$ ). **C.** The percentage of collapsed hFB growth cones was compared between IMR90 control and IMR90 $TSC2^{+/-}$

neurons. Measurements reflect collapse percentages after 15 min treatment with ephrin-A1 (2  $\mu\text{g/ml}$ ), Slit-2 (0.2  $\mu\text{g/ml}$ ), and LPA at low (0.1  $\mu\text{M}$ ) and high (1  $\mu\text{M}$ ) doses in neurosphere cultures. Changes in sensitivity are similar to that observed in patient-derived neurons in Figure 4F. Two-tailed Student's t-test, data represented as mean  $\pm$  s.e.m (A), and min, max, median, and IQR (B). Two-tailed Fisher's Exact Test (C). #  $P < 0.0001$ . Source data are provided as a Source Data file.

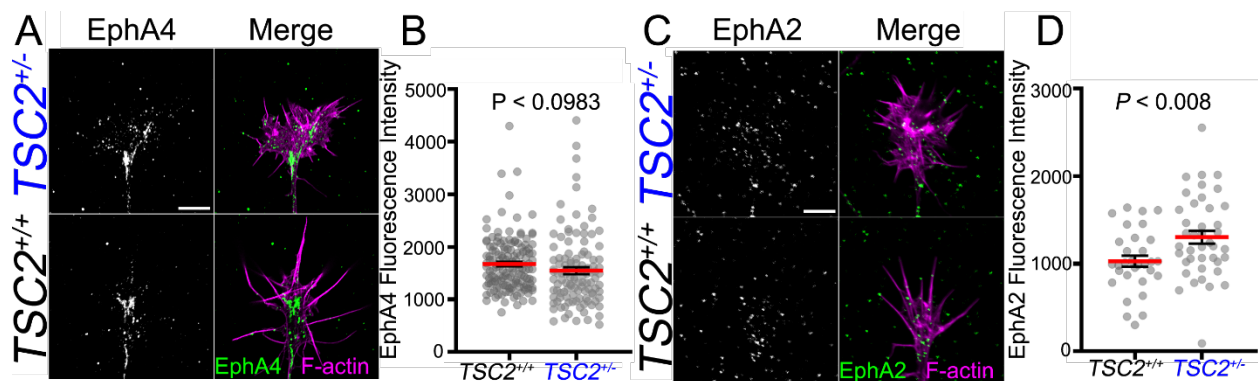

**Supplemental Figure 5:  $TSC2^{+/+}$  and  $TSC2^{+/-}$  cortical neuronal growth cones**

**express EphA4 and EphA2 receptors.** **A.** hFB neurons were fixed and immunolabeled for EphA4 receptors (green in merge) and counterstained with phalloidin to label F-actin (magenta in merge). **B.** Fluorescence intensity measurements were made within growth cones and no significant difference was observed between  $TSC2^{+/+}$  and  $TSC2^{+/-}$  neurons ( $P = 0.0983$ ). Growth cones from three independent experiments in  $TSC2^{+/+}$  clone A and  $TSC2^{+/-}$  clone A, respectively, were pooled for quantifications. **C.** hFB neurons were fixed and immunolabeled for EphA2 receptors (green in merge) and counterstained with phalloidin to label F-actin (magenta in merge). **D.** Fluorescence intensity measurements were made within growth cones and showed elevated EphA2 labeling in  $TSC2^{+/-}$  neurons relative to  $TSC2^{+/+}$  neurons ( $P = 0.008$ ). Growth cones from two independent experiments in  $TSC2^{+/+}$  clone A and  $TSC2^{+/-}$  clone A, respectively,



were pooled for quantifications. Two-tailed Student's t-test, represented as mean +/- s.e.m. Scale, 5  $\mu$ m. Source data are provided as a Source Data file.

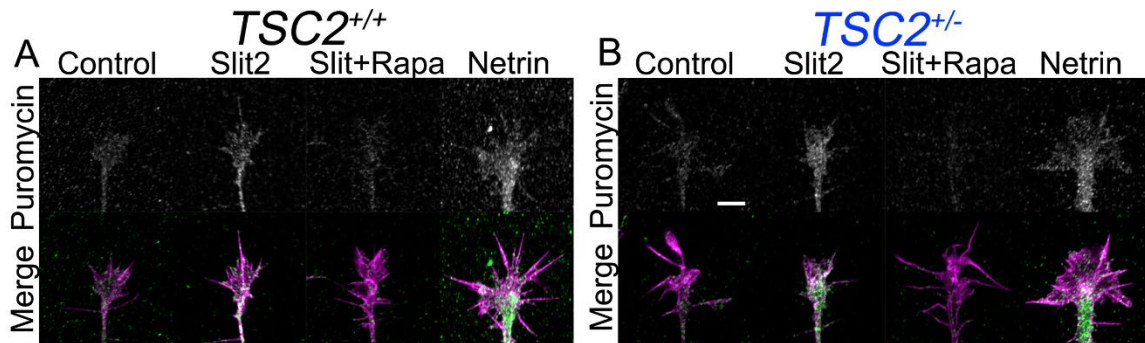

**Supplemental Figure 6: Slit-2 and Netrin activate protein synthesis in *TSC2*<sup>+/+</sup> and *TSC2*<sup>+/-</sup> cortical growth cones.** **A, B.** Puromycin labeled *TSC2*<sup>+/+</sup> (A) and *TSC2*<sup>+/-</sup> (B) hFB neuron growth cones (green in merges) counter-stained for F-actin (magenta in merges). Puromycin-labeled proteins were detected with anti-puromycin antibody (see methods). Note increased labeling in response to Slit-2 is blocked by pre-treatment with Rapamycin. Netrin treatment also increases puromycin incorporation. Quantification associated with these representative images are shown in Figure 5E and Supplementary Information. Scale, 5  $\mu$ m. Source data are provided as a Source Data file.

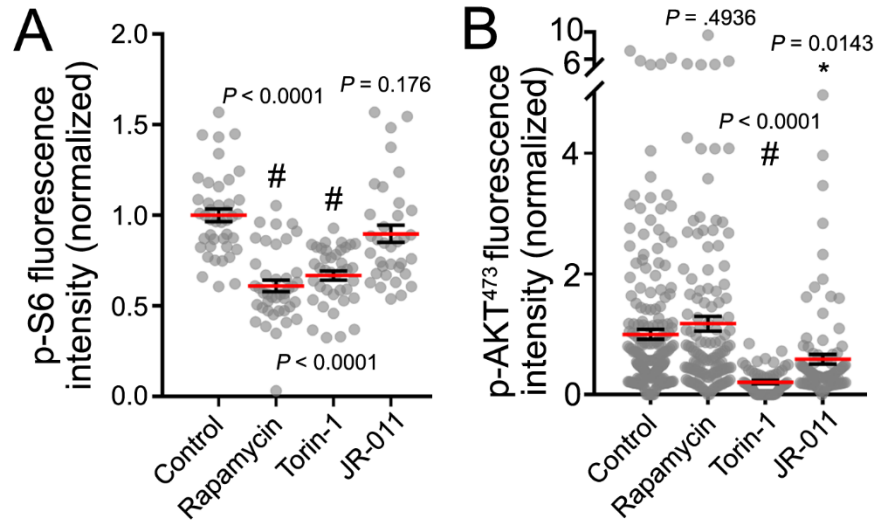

**Supplemental Figure 7: Pharmacological inhibitors effectively block mTORC1 and mTORC2 function.** hFB neurons were treated with mTOR inhibitors for 30 min then fixed and immunolabeled for p-S6 and p-AKT473, which are mTORC1- and mTORC2-specific targets, respectively. Fluorescence intensity measurements were made within growth cones and normalized to untreated control neurons (p-S6 Control vs. inhibitor: rapamycin,  $P < 0.0001$ ; Torin-1,  $P < 0.0001$ ; JR-AB2-011,  $P = 0.176$ . p-Akt Control vs. inhibitor: rapamycin,  $P < 0.4936$ ; Torin-1,  $P < 0.0001$ ; JR-AB2-011,  $P = 0.0143$ ). One-way ANOVA with Tukey's Multiple Comparison, represented as mean  $\pm$  s.e.m. \*  $P < 0.05$ , #  $P < 0.0001$ . Source data are provided as a Source Data file.

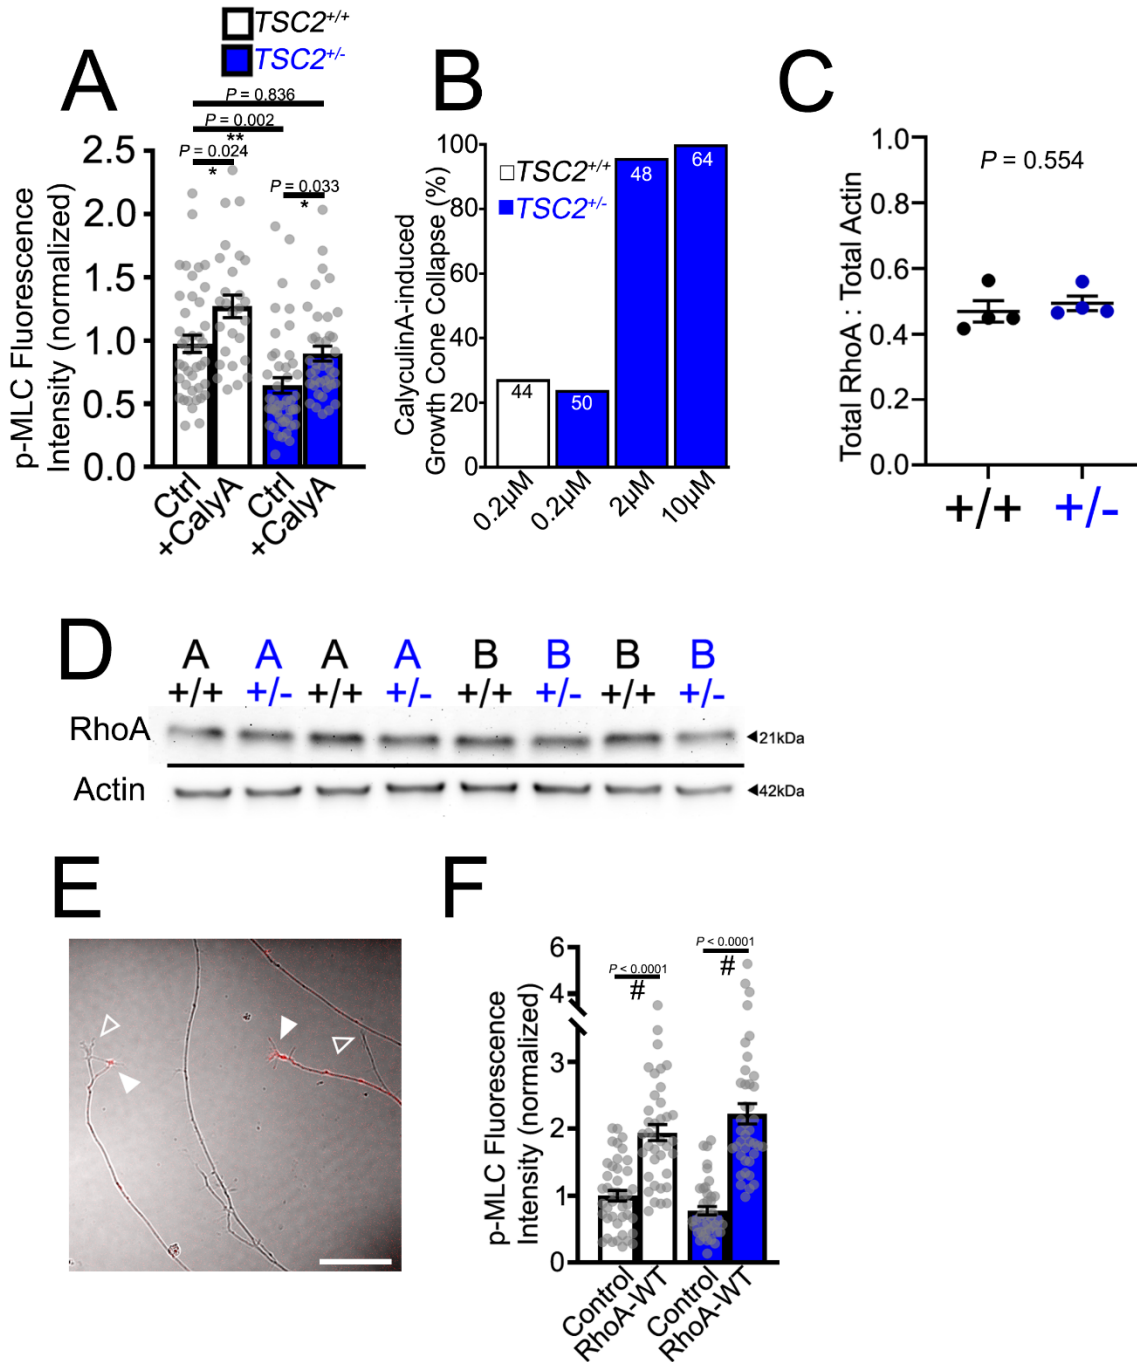

**Supplemental Figure 8: Activation of p-MLC with calyculinA in growth cones. A.**

hFB neurons were treated with low dose of calyculinA (200pM) for 15 min then fixed and immunolabeled for p-MLC. Fluorescence intensity was measured within  $TSC2^{+/+}$  and  $TSC2^{+/-}$  growth cones and normalized to untreated control neurons. CalyA

activates p-MLC in both *TSC2*<sup>+/+</sup> and *TSC2*<sup>+/-</sup> growth cones (control vs. control,  $P = 0.002$ ; *TSC2*<sup>+/+</sup> control vs. CalyculinA,  $P = 0.024$ ; *TSC2*<sup>+/-</sup> control vs. CalyculinA,  $P = 0.033$ ; *TSC2*<sup>+/+</sup> control vs. *TSC2*<sup>+/-</sup> CalyculinA,  $P = 0.836$ ). Growth cones from two independent experiments in *TSC2*<sup>+/+</sup> clone A and *TSC2*<sup>+/-</sup> clone A, respectively, were pooled for quantifications. **B.** Calyculin was bath-applied to *TSC2*<sup>+/+</sup> and *TSC2*<sup>+/-</sup> growth cones at both collapsing and sub-collapsing doses. Collapse was assayed at 30min. Growth cones from two independent experiments in *TSC2*<sup>+/+</sup> clone A and *TSC2*<sup>+/-</sup> clone A, respectively, were pooled for quantifications. **C-D.** Western blot quantification and WB image of RHOA expression ratioed to total actin in *TSC2*<sup>+/+</sup> and *TSC2*<sup>+/-</sup> neurospheres ( $P = 0.554$ ). Western blot shows data from two patient-derived clones and two independent differentiations. **E.** Representative image of lentiviral transduction in *TSC2*<sup>+/-</sup> neurites. Arrowheads show examples of RFP-positive neurites and empty arrowheads show RFP-negative neurites. Transduction rates with detectable RFP averaged 23% across 128 growth cones in 6 *TSC2*<sup>+/+</sup> neurospheres. **F.** Myosin activity within growth cones of *TSC2*<sup>+/+</sup> and *TSC2*<sup>+/-</sup> neurons transduced with RHOA-WT was increased relative to that of RFP-control transduced neurons in each genotype (*TSC2*<sup>+/+</sup> and *TSC2*<sup>+/-</sup>: control vs RhoA-WT,  $P < 0.0001$ ). Growth cones from two independent experiments in *TSC2*<sup>+/+</sup> clone A and *TSC2*<sup>+/-</sup> clone A, respectively, were pooled for quantifications. One-way ANOVA with Tukey's Multiple Comparison (A), or Two-tailed Student's t-test (C,F), represented as mean +/- s.e.m. #  $P < 0.0001$ . Source data are provided as a Source Data file.

## Supplemental Table 1:

| Figure | Panel | Genotype, Cell line, Neurosphere #, Growth Cone #                                                                                                                                                                                                                                                                                                                                                                                                                                                                                                                                                                                                                                                                 |
|--------|-------|-------------------------------------------------------------------------------------------------------------------------------------------------------------------------------------------------------------------------------------------------------------------------------------------------------------------------------------------------------------------------------------------------------------------------------------------------------------------------------------------------------------------------------------------------------------------------------------------------------------------------------------------------------------------------------------------------------------------|
| 1      | B     | <i>TSC2</i> <sup>+/+</sup> : 17 Neurospheres (NS) [6 Clone A (A), 11 Clone B (B)], 257 Growth cones (GCs), <i>TSC2</i> <sup>+/-</sup> : 12 NS (6A, 6B), 131 GCs, <i>TSC2</i> <sup>-/-</sup> : 5 NS (2 A, 3B), 27 GCs                                                                                                                                                                                                                                                                                                                                                                                                                                                                                              |
| 1      | C     | <i>TSC2</i> <sup>+/+</sup> : 30 Neurospheres (NS), <i>TSC2</i> <sup>+/-</sup> : 30 NS, <i>TSC2</i> <sup>-/-</sup> : 30 NS                                                                                                                                                                                                                                                                                                                                                                                                                                                                                                                                                                                         |
| 1      | E     | <i>TSC2</i> <sup>+/+</sup> : 7 NS (2 A, 5 B), 81 GCs, <i>TSC2</i> <sup>+/-</sup> : 7 NS (4A, 3B), 86 GCs, <i>TSC2</i> <sup>-/-</sup> : 5 NS (2 A, 3B), 74 GCs                                                                                                                                                                                                                                                                                                                                                                                                                                                                                                                                                     |
| 2      | B     | <i>TSC2</i> <sup>+/+</sup> : 8 NS (4 A, 4 B), <i>TSC2</i> <sup>+/-</sup> : 10 NS (5 A, 5 B)                                                                                                                                                                                                                                                                                                                                                                                                                                                                                                                                                                                                                       |
| 2      | D     | <i>TSC2</i> <sup>+/+</sup> 12 NS (6 A, 6 B); <i>TSC2</i> <sup>+/-</sup> 14NS (4 A, 10 B)                                                                                                                                                                                                                                                                                                                                                                                                                                                                                                                                                                                                                          |
| 2      | F     | <i>TSC2</i> <sup>+/+</sup> 5NS                                                                                                                                                                                                                                                                                                                                                                                                                                                                                                                                                                                                                                                                                    |
| 2      | H     | <i>TSC2</i> <sup>+/+</sup> 4 NS (2 A, 2 B); <i>TSC2</i> <sup>+/-</sup> 5 NS (3 A, 2 B)                                                                                                                                                                                                                                                                                                                                                                                                                                                                                                                                                                                                                            |
| 3      | B     | <i>TSC2</i> <sup>+/+</sup> : 23 NS (16 A, 7 B), 460 GCs; <i>TSC2</i> <sup>+/-</sup> : 13 NS (3 A, 10 B), 260 GCs; <i>TSC2</i> <sup>-/-</sup> : 9 NS (5 A, 4 B), 180 GCs                                                                                                                                                                                                                                                                                                                                                                                                                                                                                                                                           |
| 3      | D     | <i>TSC2</i> <sup>+/+</sup> : 5 NS (2 A, 3 B), <i>TSC2</i> <sup>+/-</sup> : 10 NS (5 A, 5 B), <i>TSC2</i> <sup>-/-</sup> : 9 NS (5 A, 4 B)                                                                                                                                                                                                                                                                                                                                                                                                                                                                                                                                                                         |
| 4      | B     | <i>TSC2</i> <sup>+/+</sup> 3 NS (2 A, 1 B), 15 GCs; <i>TSC2</i> <sup>+/-</sup> 2 NS (1 A, 1 B), 22 GCs                                                                                                                                                                                                                                                                                                                                                                                                                                                                                                                                                                                                            |
| 4      | C     | <i>TSC2</i> <sup>+/+</sup> 4 NS (2 A, 2 B), 24 GCs; <i>TSC2</i> <sup>+/-</sup> 2 NS (1 A, 1 B), 10 GCs                                                                                                                                                                                                                                                                                                                                                                                                                                                                                                                                                                                                            |
| 4      | F     | Slit-2: <i>TSC2</i> <sup>+/+</sup> 7 NS (4 A, 3 B), 89 GCs; <i>TSC2</i> <sup>+/-</sup> 5 NS (2 A, 3 B), 50 GCs; ephrin low: <i>TSC2</i> <sup>+/+</sup> 22 NS (18 A, 4 B), 313 GCs; <i>TSC2</i> <sup>+/-</sup> 12 NS (7 A, 5 B) 78 GCs; ephrin high <i>TSC2</i> <sup>+/+</sup> 26 NS (20 A, 6 B), 352 GCs; <i>TSC2</i> <sup>+/-</sup> 7 NS (2 A, 5 B), 86 GCs; LPA low <i>TSC2</i> <sup>+/+</sup> 14 NS (6 A, 8 B), 199 GCs; <i>TSC2</i> <sup>+/-</sup> 12 NS (6 A, 6 B), 201 GCs; LPA high <i>TSC2</i> <sup>+/+</sup> 4 NS (2 A, 2 B) 28 GCs; <i>TSC2</i> <sup>+/-</sup> 4 NS (2 A, 2 B), 22 GCs; control <i>TSC2</i> <sup>+/+</sup> 9 NS (2 A, 7 B), 114 GCs; <i>TSC2</i> <sup>+/-</sup> 6 NS (2 A, 4 B), 89 GCs |
| 5      | B     | Control: <i>TSC2</i> <sup>+/+</sup> 9 NS (5 A, 4 B), 98 GCs; <i>TSC2</i> <sup>+/-</sup> 12 NS (7 A, 5 B), 110 GCs; <i>TSC2</i> <sup>-/-</sup> 8 NS (4 A, 4 B), 81 GCs; Rapa: <i>TSC2</i> <sup>+/+</sup> 3 NS (2 A, 1 B), 41 GCs; <i>TSC2</i> <sup>+/-</sup> 6 NS (3 A, 3 B), 42 GCs; <i>TSC2</i> <sup>-/-</sup> 8 NS (4 A, 4 B), 64 GCs; Aniso: <i>TSC2</i> <sup>+/+</sup> 4 NS (4 A), 45 GCs                                                                                                                                                                                                                                                                                                                     |
| 5      | D     | Control: <i>TSC2</i> <sup>+/+</sup> 9 NS (5 A, 4 B), 79 GCs; <i>TSC2</i> <sup>+/-</sup> 6 NS (3 A, 3 B), 95 GCs; <i>TSC2</i> <sup>-/-</sup> 4 NS (2 A, 2 B), 42 GCs; ephrin: <i>TSC2</i> <sup>+/+</sup> 6 NS (2 A, 4 B), 67 GCs; <i>TSC2</i> <sup>+/-</sup> 10 NS (8 A, 2 B), 120 GCs; <i>TSC2</i> <sup>-/-</sup> 5 NS (2 A, 3 B), 34 GCs                                                                                                                                                                                                                                                                                                                                                                         |
| 5      | E     | Control: <i>TSC2</i> <sup>+/+</sup> 9 NS (4 A, 5 B), 105 GCs; <i>TSC2</i> <sup>+/-</sup> 10 NS (2 A, 8 B), 136 GCs; Slit-2: <i>TSC2</i> <sup>+/+</sup> 7 NS (5 A, 2 B), 119 GCs; <i>TSC2</i> <sup>+/-</sup> 12 NS (6 A, 6 B) 110 GCs; Slit-2 + Rapa: <i>TSC2</i> <sup>+/+</sup> 7 NS (3 A, 4 B), 43 GCs; <i>TSC2</i> <sup>+/-</sup> 7 NS (3 A, 4 B), 84 GCs; Netrin: <i>TSC2</i> <sup>+/+</sup> 4 NS (2 A, 2 B), 45 GCs; <i>TSC2</i> <sup>+/-</sup> 8 NS (6 A, 2 B), 100 GCs                                                                                                                                                                                                                                      |
| 6      | A     | Control: <i>TSC2</i> <sup>+/+</sup> 10 NS (4 A, 6 B), 110 GCs; <i>TSC2</i> <sup>+/-</sup> 10 NS (6 A, 4 B), 108 GCs; Torin1: <i>TSC2</i> <sup>+/+</sup> 7 NS (4 A, 3 B), 55 GCs; <i>TSC2</i> <sup>+/-</sup> 12 NS (6 A, 6 B) 94 GCs; Rapa: <i>TSC2</i> <sup>+/+</sup> 4 NS (2 A, 2 B), 44 GCs; <i>TSC2</i> <sup>+/-</sup> 5 NS (2 A, 3 B), 40 GCs; JR-011: <i>TSC2</i> <sup>+/-</sup> 4 NS (2 A, 2 B), 42 GCs                                                                                                                                                                                                                                                                                                     |
| 6      | B     | Control: <i>TSC2</i> <sup>+/+</sup> 8 NS (6 A, 2 B), 80 GCs; <i>TSC2</i> <sup>+/-</sup> 5 NS (2 A, 3 B), 58 GCs; Torin1: <i>TSC2</i> <sup>+/+</sup> 7 NS (5 A, 2 B), 93 GCs; <i>TSC2</i> <sup>+/-</sup> 6 NS (2 A, 4 B) 47 GCs; Rapa: <i>TSC2</i> <sup>+/+</sup> 4 NS (2 A, 2 B), 82 GCs; <i>TSC2</i> <sup>+/-</sup> 6 NS (4 A, 2 B), 37 GCs; Rapa 4DIV: <i>TSC2</i> <sup>+/-</sup> 5 NS (2 A, 3 B), 42 GCs; Rapa 21DIV: <i>TSC2</i> <sup>+/-</sup> 4 NS (2 A, 2 B), 45 GCs                                                                                                                                                                                                                                       |
| 6      | C     | Control: <i>TSC2</i> <sup>+/+</sup> 6 NS (3 A, 3 B), 84 GCs; <i>TSC2</i> <sup>+/-</sup> 18 NS (15 A, 3 B), 198 GCs; Torin1: <i>TSC2</i> <sup>+/+</sup> 9 NS (7 A, 2 B), 80 GCs; <i>TSC2</i> <sup>+/-</sup> 5 NS (3 A, 2 B) 69 GCs; Rapa: <i>TSC2</i> <sup>+/+</sup> 7 NS (5 A, 2 B), 91 GCs; <i>TSC2</i> <sup>+/-</sup> 6 NS (4 A, 2 B), 109 GCs; JR-011: <i>TSC2</i> <sup>+/-</sup> 5 NS (3 A, 2 B), 64 GCs                                                                                                                                                                                                                                                                                                      |
| 6      | D     | Control: <i>TSC2</i> <sup>+/+</sup> 17 NS (14 A, 3 B), 129 GCs; <i>TSC2</i> <sup>+/-</sup> 9 NS (2 A, 7 B), 99 GCs; Torin1: <i>TSC2</i> <sup>+/+</sup> 8 NS (3 A, 5 B), 122 GCs; <i>TSC2</i> <sup>+/-</sup> 11 NS (5 A, 6 B) 72 GCs; Rapa: <i>TSC2</i> <sup>+/+</sup> 9 NS (3 A, 6 B), 127 GCs; <i>TSC2</i> <sup>+/-</sup> 4 NS (2 A, 2 B), 73 GCs; Rapa 4DIV: <i>TSC2</i> <sup>+/-</sup> 6 NS (2 A, 4 B), 90 GCs; Rapa 21DIV: <i>TSC2</i> <sup>+/-</sup> 5 NS (3 A, 2 B), 70 GCs                                                                                                                                                                                                                                 |
| 6      | F     | <i>TSC2</i> <sup>+/+</sup> 11 NS (7 A, 4 B); <i>TSC2</i> <sup>+/-</sup> 8 NS (3 A, 5 B)                                                                                                                                                                                                                                                                                                                                                                                                                                                                                                                                                                                                                           |
| 6      | H     | <i>TSC2</i> <sup>+/+</sup> 10 NS (3 A, 7 B); <i>TSC2</i> <sup>+/-</sup> 5 NS (2 A, 3 B)                                                                                                                                                                                                                                                                                                                                                                                                                                                                                                                                                                                                                           |
| 7      | B     | <i>TSC2</i> <sup>+/+</sup> 10 NS (A), 18 GCs; <i>TSC2</i> <sup>+/-</sup> 9 NS (A), 13 GCs                                                                                                                                                                                                                                                                                                                                                                                                                                                                                                                                                                                                                         |
| 7      | C     | Control: <i>TSC2</i> <sup>+/+</sup> 6 groups of 30 NS (3A, 3B); <i>TSC2</i> <sup>+/-</sup> 6 groups of 30 NS (3A, 3B), ephrin: <i>TSC2</i> <sup>+/+</sup> 4 groups of 30 NS, <i>TSC2</i> <sup>+/-</sup> 4 groups of 30 NS (2A, 2B)                                                                                                                                                                                                                                                                                                                                                                                                                                                                                |
| 7      | F     | Control: <i>TSC2</i> <sup>+/+</sup> 9 NS (3A, 6B), 64 GCs; <i>TSC2</i> <sup>+/-</sup> 6 NS (2A, 4B), 69 GCs; Ephrin: <i>TSC2</i> <sup>+/+</sup> 9 NS (3A, 6B), 84 GCs; <i>TSC2</i> <sup>+/-</sup> 10 NS (5A, 5B), 84 GCs                                                                                                                                                                                                                                                                                                                                                                                                                                                                                          |

8 B Control: TSC2<sup>+/+</sup> 4 NS (2 A, 2 B), 61 GCs; TSC2<sup>+/-</sup> 5 NS (3 A, 2 B), 51 GCs; Y27632: TSC2<sup>+/+</sup> 6 NS (4 A, 2 B), 58 GCs; TSC2<sup>+/-</sup> 4 NS (2 A, 2 B) 30 GCs; Blebb: TSC2<sup>+/+</sup> 4 NS (2 A, 2 B), 25 GCs; TSC2<sup>+/-</sup> 4 NS (2 A, 2 B), 30 GCs; CalyA: TSC2<sup>+/+</sup> 4 NS (2 A, 2 B), 39 GCs; TSC2<sup>+/-</sup> 5 NS (3 A, 2 B), 39 GCs; Control-lenti: TSC2<sup>+/-</sup> 7 NS (4 A, 3 B), 54 GCs; RHOA-lenti: TSC2<sup>+/-</sup> 7 NS (3 A, 4 B), 34 GCs

8 C Control: TSC2<sup>+/+</sup> 4 NS (2 A, 2 B), 62 GCs; TSC2<sup>+/-</sup> 4 NS (2 A, 2 B), 38 GCs; Y27632: TSC2<sup>+/+</sup> 4 NS (2 A, 2 B), 45 GCs; TSC2<sup>+/-</sup> 4 NS (2 A, 2 B) 53 GCs; C3 Transferase: TSC2<sup>+/+</sup> 6 NS (2 A, 4 B), 50 GCs; TSC2<sup>+/-</sup> 5 NS (2 A, 3 B) 49 GCs; Blebb: TSC2<sup>+/+</sup> 5 NS (2 A, 3 B), 48 GCs; TSC2<sup>+/-</sup> 6 NS (3 A, 3 B), 74 GCs; CalyA: TSC2<sup>+/+</sup> 7 NS (5 A, 2 B), 62 GCs; TSC2<sup>+/-</sup> 6 NS (3 A, 3 B), 62 GCs; Control-lenti: TSC2<sup>+/-</sup> 5 NS (3 A, 2 B), 58 GCs; RHOA-lenti: TSC2<sup>+/-</sup> 5 NS (3 A, 2 B), 59 GCs

8 E Y-27632: TSC2<sup>+/+</sup> 10 NS (4A, 6B); TSC2<sup>+/-</sup> 4 NS (2A, 2B)

S1 D TSC2<sup>+/+</sup> patient clone 1: (PAX6 704 cells, SOX2 666 cells, FOXG1 734 cells); TSC2<sup>+/+</sup> patient clone 2: (PAX6 328 cells, SOX2 868 cells, FOXG1 298 cells); TSC2<sup>+/+</sup> IMR90: (PAX6 548 cells, SOX2 593 cells, FOXG1 226 cells); TSC2<sup>+/-</sup> patient clone 1: (PAX6 262 cells, SOX2 1286 cells, FOXG1 311 cells); TSC2<sup>+/-</sup> patient clone 2: (PAX6 397 cells, SOX2 470 cells, FOXG1 348 cells); TSC2<sup>+/-</sup> IMR90: (PAX6 384 cells, SOX2 434 cells, FOXG1 139 cells); TSC2<sup>-/-</sup> patient clone 1: (PAX6 398 cells, SOX2 381 cells, FOXG1 7233 cells); TSC2<sup>-/-</sup> patient clone 2: (PAX6 185 cells, SOX2 274 cells, FOXG1 350 cells);

S1 F IMR90-TSC2<sup>+/+</sup>: 8 NS, 109 GCs, IMR90-TSC2<sup>+/-</sup>: 9 NS, 109 GCs

S1 G IMR90-TSC2<sup>+/+</sup>: 3 NS, 41 GCs, IMR90-TSC2<sup>+/-</sup>: 5 NS, 39 GCs

S2 B TSC2<sup>+/+</sup> 13 NS (8 A, 5 B); TSC2<sup>+/-</sup> 12 NS (5 A, 7 B)

S2 D TSC2<sup>+/+</sup> 6 NS (3 A, 3 B); TSC2<sup>+/-</sup> 4 NS (2 A, 2 B)

S2 F IMR90-TSC2<sup>+/+</sup> 6 NS; TSC2<sup>+/-</sup> 7 NS

S2 H IMR90-TSC2<sup>+/+</sup> 3 NS; TSC2<sup>+/-</sup> 5 NS

S3 B TSC2<sup>+/+</sup> 251 neurons; TSC2<sup>+/-</sup> 230 neurons

S3 D TSC2<sup>+/+</sup> 4 NS, 43 GCs; TSC2<sup>+/-</sup> 5NS, 47 GCs

S3 E TSC2<sup>+/+</sup> 2 NS, 50 GCs; TSC2<sup>+/-</sup> 2 NS, 61 GCs

S3 F Sema-3F low: TSC2<sup>+/+</sup> 4 NS, 50 GCs; TSC2<sup>+/-</sup> 4 NS, 56 GCs; Sema-3F high: TSC2<sup>+/+</sup> 5 NS, 50 GCs; TSC2<sup>+/-</sup> 5 NS, 63 GCs; ephrin TSC2<sup>+/+</sup> 4 NS, 63 GCs; TSC2<sup>+/-</sup> 5 NS, 54 GCs

S4 A Patient lines, all genotypes: 9 NS, 180 GCs

S4 B IMR90-TSC2<sup>+/+</sup> p34: 6 NS, 130 GCs; p55: 8 NS, 112 GCs; TSC2<sup>+/-</sup> p43: 3 NS, 57 GCs; p50 4 NS, 60 GCs; H9 p34: 10 NS, 109 GCs, p55: 8 NS, 118 GCs; Patient lines: TSC2<sup>+/+</sup> p27: 5 NS, 78 GCs, p55: 6NS, 77 GCs; TSC2<sup>+/-</sup> p27: 9 NS, 153 GCs, p55: 10NS, 167 GCs; TSC2<sup>-/-</sup> p27: 5 NS, 93 GCs, p55: 11 NS, 129 GCs

S4 C Slit-2: IMR90-TSC2<sup>+/+</sup> 7 NS, 83 GCs; TSC2<sup>+/-</sup> 4 NS, 38 GCs; ephrin: TSC2<sup>+/+</sup> 6 NS, 88 GCs; TSC2<sup>+/-</sup> 12 NS, 86 GCs; LPA high TSC2<sup>+/+</sup> 2 NS, 20 GCs; TSC2<sup>+/-</sup> 2 NS, 23 GCs; LPA low TSC2<sup>+/+</sup> 15 NS, 163 GCs; TSC2<sup>+/-</sup> 5 NS, 46 GCs

S5 B TSC2<sup>+/+</sup> 7 NS, 144 GCs, TSC2<sup>+/-</sup> 3 NS, 111 GCs

S5 D TSC2<sup>+/+</sup>, 2NS, 31 GCs, TSC2<sup>+/-</sup>, 2 NS, 41 GCs

S7 A p-S6: Control 4 NS, 42 GCs; Rapa 4 NS, 41 GCs; Torin-1 4 NS, 39 GCs, JR-011 4NS, 35 GCs

S7 B p-Akt: Control 15 NS, 195 GCs; Rapa 14 NS, 132 GCs; Torin-1 4 NS, 60 GCs, JR-011 7 NS, 99 GCs

S8 A TSC2<sup>+/+</sup> Control: 2NS, 42 GCs; CalyA: 2 NS, 27 GCs; TSC2<sup>+/-</sup> Control: 2 NS, 44 GCs, CalyA 3 NS, 40 GCs

S8 B TSC2<sup>+/+</sup> 200pM: 3 NS, 44 GCs; TSC2<sup>+/-</sup> 200pM: 3 NS, 50 GCs, 2uM: 4 NS, 48 GCs, 10 uM: 4 NS, 64 GCs

S8 C Each group: 30 NS

S8 E TSC2<sup>+/+</sup>, 6 NS, 128 GCs

S8 F TSC2<sup>+/+</sup> Control-lenti: 3NS, 43 GCs; RHOA-WT: 3 NS, 38 GCs; TSC2<sup>+/-</sup> Control-lenti: 2 NS, 42 GCs, RHOA-WT 2 NS, 40 GCs

Summary of experimental replicates by genotype, cell line, and clone. Neurospheres (NS), clone A (A), clone (B), and genotype are indicated. Minimum two differentiations per experiment, 1-5 neurospheres per experimental group per differentiation.

## Supplemental Table 2: Primers

### sgRNA cloning

|                                 |                           |
|---------------------------------|---------------------------|
| <i>TSC2 induction sgRNA 1 F</i> | CACCGCACACAGAAACCGCCTTACC |
| <i>TSC2 induction sgRNA 1 R</i> | AAACGGTAAGGCGGTTTCTGTGTGC |
| <i>TSC2-correction (-) F</i>    | CACCGCGCCTTACCTGCTAAAATGA |
| <i>TSC2-correction (-) R</i>    | AAACTCATTTTAGCAGGTAAGGCGC |

### ssODN

|                              |                                                                                                                                                         |
|------------------------------|---------------------------------------------------------------------------------------------------------------------------------------------------------|
| <i>TSC2 correction ssODN</i> | ATGGGTGGGCAGGCGTGAGGGGAGCTCTCCCGTTCCTGCCAGCTCACTGCACACAGAA<br>ACCGCCTTACCTGGTAAAATGATGGCAACACAGATGTCGGCGAGTTCCCTGAGAGAATAG<br>AGCCGGTGGGCTCCCCAGAGAGCCA |
| <i>TSC2 induction ssODN</i>  | ATGGGTGGGCAGGCGTGAGGGGAGCTCTCCCGTTCCTGCCAGCTCACTGCACACAGAA<br>ACCGCCTTACCTGCTAAAATGATGGCAACACAGATGTCGGCGAGTTCCCTGAGAGAATAG<br>AGCCGGTGGGCTCCCCAGAGAGCCA |

### Genotyping primers

|                           |                      |
|---------------------------|----------------------|
| <i>TSC2 genotyping 2F</i> | TGTGGCTTTCCTTCTTGGCT |
| <i>TSC2 genotyping 2R</i> | CTACAAAGGGCCCCAAACCT |

### Off-target analysis primers

|                              |                          |
|------------------------------|--------------------------|
| <i>TSC2 Induction OT 1F</i>  | CCCCAGTGTCTAGCATAGCG     |
| <i>TSC2 Induction OT 1R</i>  | GTGAAGAGCTTTCTTCCATTTCA  |
| <i>TSC2 Induction OT 2F</i>  | CTGAGCCAACCTAAGGTCCC     |
| <i>TSC2 Induction OT 2R</i>  | AACCATGCAAGTGAGGGAGG     |
| <i>TSC2 Induction OT 3F</i>  | TGTCTCTGAAAAATGAAGACGTGA |
| <i>TSC2 Induction OT 3R</i>  | TGGGGCAGTTTGGGACAATG     |
| <i>TSC2 Induction OT 4F</i>  | TTGGTGTGTTTGGGGCTTCT     |
| <i>TSC2 Induction OT 4R</i>  | ACCAAAGCCAGATAACCGGG     |
| <i>TSC2 Induction OT 5F</i>  | ACCTCATCAGCGTGCATACC     |
| <i>TSC2 Induction OT 5R</i>  | GTGAGTGCAGAAGCTGGAGT     |
| <i>TSC2 correction OT 1F</i> | GACCCAGCAGTGTATTCCCC     |
| <i>TSC2 correction OT 1R</i> | AGCTGTGGACTGTCTCTGGA     |
| <i>TSC2 correction OT 2F</i> | TCTGTTCTCCCACATGCCAC     |
| <i>TSC2 correction OT 2R</i> | TGCTAGACCCAGAGACCCAG     |
| <i>TSC2 correction OT 3F</i> | GATGGCGAGACTCACTCCTG     |
| <i>TSC2 correction OT 3R</i> | CGTCTCACCTCCCTCCCTTA     |
| <i>TSC2 correction OT 4F</i> | TCCCGCAATGCCCATATAGC     |
| <i>TSC2 correction OT 4R</i> | TGATGTCTGTTGGAACCCAG     |
| <i>TSC2 correction OT 5F</i> | CTGCAGCCTCCTTGGAGAAA     |
| <i>TSC2 correction OT 5R</i> | CACCCTGGCAAGCAATGTTC     |

## Supplemental Table 3: Antibodies

| <b>Vendor</b>          | <b>Antibody</b>                         | <b>Item ID #</b> | <b>Assay &amp; Dilution</b> | <b>Verification</b>                                                                               |
|------------------------|-----------------------------------------|------------------|-----------------------------|---------------------------------------------------------------------------------------------------|
| MP Biomedicals         | Actin                                   | 8691001          | WB (1:5000)                 | Actin: Verified in our lab via WB band at appropriate size.                                       |
| Sigma                  | beta-III tubulin                        | T8660-100UL      | IF (1:500)                  | beta-III tubulin: by peer review, >360 citations                                                  |
| Cell Signaling         | EphA2(D4A2)                             | 6997T            | IF (1:250)                  | EphA2: by manufacturer, via EphA2 expressing and non-expressing cell lines, respectively.         |
| Jackson Immunoresearch | Fc                                      | 109-005-098      | IF (1:250)                  | Anti-Fc: Verified in our lab via staining of Fc protein carpets.                                  |
| Abcam                  | FOXC1                                   | ab18259          | IF (1:200)                  | FoxG1: by manufacturer, via FoxG1 overexpression in embryonic cortex.                             |
| DSHB                   | Hb9 Mnx1                                | 81.5C10-c        | IF (1:40)                   | Hb9: by depositor, Tanabe et al., Cell 1998                                                       |
| Sigma                  | MAP2                                    | M4403            | IF (1:500)                  | MAP2: by manufacturer immunofluorescent labeling specific to dendritic processes                  |
| R&D Systems            | mEphA4                                  | AF641            | IF (1:250)                  | EphA4: by manufacturer, via specific staining of embryonic rat rib cartilage primordium.          |
| Cell Signaling         | Nanog (D73G4)                           | 4903T            | IF (1:200)                  | Nanog: by manufacturer, via immunofluorescent staining of pluripotent and differentiated cells    |
| Cell Signaling         | Oct-4A (C20A3)                          | 2840T            | IF (1:400)                  | Oct4a: by manufacturer, via immunofluorescent staining of pluripotent and differentiated cells    |
| DSHB                   | PAX6                                    | PAX6             | IF (1:40)                   | Pax6: by depositor, Kawakami et al., Mech Dev 1997.                                               |
| Cell Signaling         | phospho-Akt (S473)                      | 4060S            | IF (1:400)                  | p-Akt: by manufacturer, via PI3K inhibition and insulin treatments, respectively.                 |
| ThermoFisher           | phospho-MYL9 (Thr18, Ser19)             | PA5-17727        | IF (1:250)                  | p-MYL9: by manufacturer, via co-labeling w/ actin in HeLa cells.                                  |
| Cell Signaling         | phospho-S6 ribosomal protein (S235/236) | 48585            | WB (1:1000);<br>IF (1:100)  | p-S6: by manufacturer, via rapamycin and serum treatment, respectively.                           |
| Cell Signaling         | phospho-S6 ribosomal protein (S235/236) | 62016S           | IF (1:400)                  | p-S6: by manufacturer, via rapamycin and serum treatment, respectively.                           |
| DSHB                   | puromycin                               | PMY-2A4-s        | IF (1:40)                   | Puromycin: Verified in our lab via protein synthesis inhibition and agonist experiments.          |
| Cell Signaling         | RhoA                                    | 2117             | WB (1:1000)                 | RhoA: by manufacturer, via cell line overexpression and WB assay                                  |
| Cell Signaling         | S6 ribosomal protein                    | 2317S            | WB (1:1000);<br>IF (1:50)   | S6: by manufacturer, via WB band at appropriate size                                              |
| R&D Systems            | SOX2                                    | AF2018           | IF (1:250)                  | Sox2: by manufacturer, via specific staining in multiple neural-differentiated stem cell lines.   |
| Dako                   | Tau                                     | A0024            | IF (1:500)                  | Tau: by peer review, >160 citations.                                                              |
| Invitrogen             | Tra-1-60                                | ma1-023          | IF (1:75)                   | Tra-1-60: by manufacturer, via immunofluorescent staining of pluripotent and differentiated cells |
| Cell Signaling         | Tuberin/TSC2                            | 3635             | WB (1:1000);<br>IF (1:400)  | TSC2: Verified in our lab via staining patterns in WT and TSC2(-/-) cell lines                    |
| Sigma                  | tubulin, acetylated                     | T6793-2ML        | IF (1:500)                  | Acetylated-tubulin: by peer review, >700 citations.                                               |
| Jackson Immunoresearch | HRP – anti-Rabbit                       | 211-032-171      | WB (1:10000)                | HRP: by peer review, > 200 citations                                                              |
